# Supplementary material for: Intensity Thresholds on Raw Acceleration Data: Euclidean Norm Minus One (ENMO) and Mean Amplitude Deviation (MAD) Approaches
Source: PLoS One. 2016 Oct 5;11(10):e0164045. doi: 10.1371/journal.pone.0164045 (PMC5051724; doi:10.1371/journal.pone.0164045)
Supplement: S1 File — (XLSX) [file pone.0164045.s001.xlsx]

## Sheet: Participant Characteristics
ID	Gender	Height (m)	Weight (kg)	BMI
1	F	1.76	65.6	21.1777
2	F	1.56	61	25.0657
3	M	1.73	78.8	26.329
4	F	1.68	53.5	18.9555
5	F	1.61	56.4	21.7584
6	M	1.78	90.1	28.4371
7	F	1.62	77.2	29.4162
8	M	1.85	111.5	32.5785
9	F	1.55	45.3	18.8554
10	F	1.66	62.1	22.5359
11	F	1.72	66.8	22.5798
12	M	1.79	75.5	23.5636
13	F	1.77	97.9	31.249
14	F	1.66	66	23.9512
15	F	1.82	88	26.5668
16	F	1.76	73.3	23.6635
17	F	1.62	66.7	25.4153
18	F	1.63	61.7	23.2226
19	F	1.52	58.6	25.3636
20	F	1.69	56.4	19.7472
21	F	1.5	48.1	21.3778
22	F	1.65	65.5	24.0588
23	M	1.85	94.2	27.5237
24	M	1.68	56.7	20.0893
25	M	1.74	80	26.4236
26	M	1.81	92.1	28.1127
27	F	1.68	61.8	21.8963
28	M	1.73	68.4	22.8541
29	M	1.69	63.1	22.0931
30	M	1.68	52.6	18.6366
31	M	1.83	80.3	23.978
32	M	1.81	61.7	18.8334
33	F	1.61	55.5	21.4112
	Mean	1.67864	69.4667	23.8703
	SD	0.0978967	16.2438	3.67942

## Sheet: ENMO - ActiGraph
ActiGraph Hip	Calibrated Euclidean Norm Minus One (measured in milligravity units [mg]) for each individual for each activity - ACTIGRAPH Hip
	ID Number	Activity: Lying				Activity: Sitting							Activity: Upright
		1	2	3	4	5	6	7	8	9	10	11	12	13	14	15	16
	1	3.47917	1.32744	1.3733	4.03195	3.03974	0.633477	0.688993	N/A	N/A	3.9666	1.0563	2.17475	4.59955	15.4356	27.6433	84.3456
	2	5.23283	2.34627	4.50555	0.351389	4.37573	0.658019	0.932859	N/A	N/A	3.93382	3.03883	9.12298	3.84917	12.8383	19.1581	68.1109
	3	5.71379	2.79189	3.87641	0.897936	4.07792	3.94246	2.13393	1.95483	1.6013	2.55965	1.0435	2.58838	2.94246	9.69834	15.1309	32.1659
	4	0.0018366	0.0255431	20.9673	18.6424	22.161	12.5775	18.7644	19.7703	21.6675	23.2593	3.36663	23.5361	22.1844	32.6953	28.8398	39.5714
	5	2.24571	2.05005	2.69701	1.19906	4.86474	2.82637	5.55184	3.52691	3.62288	4.3895	1.20453	4.67523	9.5566	24.0518	29.3064	62.8565
	6	3.37803	6.5433	91.3631	14.7895	8.72542	1.23722	2.91662	2.96161	3.5171	3.39244	2.90791	3.56372	8.22325	73.6884	28.83	13.3409
	7	8.61272	3.769	1.42425	0.877679	6.3951	7.42315	6.58678	2.81037	3.79354	5.5584	3.17083	4.62669	6.75379	16.0541	15.7599	66.0528
	8	2.923	0.799621	13.1095	10.9156	3.20885	0.119873	0.505554	0.922065	0.932106	4.29298	1.01376	3.92088	6.03886	21.1508	29.9949	86.9671
	9	7.48822	1.0052	20.7167	19.3377	4.08109	0.35159	0.272827	0.989799	1.29472	1.32387	0.164685	5.70914	3.11647	18.6926	19.389	65.8197
	10	3.69822	0.680024	2.43882	0.557484	1.97807	1.97625	1.23911	1.03283	1.85909	0.750415	0.0656559	2.68065	2.98339	5.03385	17.7224	60.8058
	11	6.27701	1.86897	0.704275	0.0449041	5.89856	5.55667	5.68303	4.52978	4.59071	4.13804	5.35179	7.73159	9.69699	25.3184	50.0869	62.1181
	12	6.4942	2.16982	5.04866	1.19788	4.41313	0.562141	4.11834	2.30914	2.88069	3.08487	1.69248	3.05268	3.05008	19.9317	14.5973	29.8493
	13	4.04865	1.3044	9.31566	9.2544	2.44151	1.25104	0.763338	1.17254	0.755678	0.615265	0.329465	1.35298	3.39072	7.4958	22.4913	61.4404
	14	1.79605	1.36568	1.50419	0.670117	3.29279	1.51426	1.80543	1.90284	2.9556	4.22349	1.36931	5.53096	5.47131	13.5235	17.9847	53.3284
	15	8.11114	3.56037	1.49812	0.436401	3.47982	1.95616	1.17433	2.04392	2.6733	2.27499	0.986033	2.89833	5.83893	12.8517	34.2556	69.8854
	16	2.25459	1.94645	2.43407	10.5492	11.2679	15.6379	14.6665	7.40902	6.21216	5.11611	5.79249	3.96376	7.17343	9.39392	9.51721	8.44898
	17	3.74204	2.06403	1.71545	0.870181	3.69783	4.75712	3.53087	4.06181	1.94662	3.28274	3.45229	4.22668	7.05905	27.9101	26.6345	99.5739
	18	5.11631	2.135	2.56765	1.91631	3.72604	1.35533	1.52239	4.29216	2.28004	1.45544	1.22015	1.79184	4.69623	19.7015	21.3097	58.8216
	19	7.73615	1.31735	2.23002	0.494801	1.05289	2.18585	1.5716	1.18966	0.692807	0.540267	0.219646	1.23476	2.2359	7.71079	11.581	67.205
	20	2.57843	0.172453	0.654344	0.0072226	1.67739	1.17541	1.42836	0.865827	2.80963	2.63527	1.45176	1.98114	3.18635	27.3377	36.1332	88.0089
	21	2.88306	0.617579	0.711239	0.457234	10.3326	6.0031	3.64827	4.25227	3.56127	10.328	4.06884	6.22641	7.74696	11.734	15.028	49.8257
	22	3.47982	2.86379	0.948023	0.168487	3.45726	1.46123	2.73264	1.21044	1.32345	3.20285	3.76627	2.19299	2.69972	11.284	16.9977	56.4542
	23	3.09483	2.91966	3.26657	2.02551	4.37592	1.04545	1.32831	1.00024	0.850811	1.53893	0.754437	0.694397	9.59769	8.22753	18.8385	56.4894
	24	3.48836	2.71649	2.32216	3.30585	5.94816	2.03	0.296632	1.47479	2.4642	1.05411	1.38699	1.65311	7.85017	13.3923	12.7863	31.5835
	25	2.30732	2.04892	3.57266	2.06379	4.78294	1.78086	1.77551	1.02117	0.891518	3.0967	2.17606	3.11083	12.1053	37.6549	51.7905	95.4199
	26	4.59294	3.20759	3.14523	0.842776	4.71616	1.37036	5.27947	1.0711	1.06127	2.50806	1.51574	0.480031	4.31477	25.3972	19.2066	56.6685
	27	4.10967	0.347762	0.59263	6.39242	5.10469	0.218595	1.05534	0.291076	0.898811	0.831734	0.487339	1.49288	6.54432	15.163	11.7538	63.5142
	28	5.16925	5.04142	1.32563	0.0174081	2.08052	0.334508	1.10444	0.364836	3.28396	2.07763	2.08237	1.46479	3.55636	11.6388	13.9567	37.3185
	29	4.82955	2.25399	4.02534	5.21349	2.16519	0.896907	1.58205	0.78425	0.384735	1.14467	1.27018	1.97782	7.93081	16.0792	18.0684	61.868
	30	11.741	7.02422	4.30689	3.76902	2.43401	2.94302	2.99515	2.97828	3.82092	2.81428	1.33733	0.785821	3.94754	22.8585	35.0399	65.0082
	31	2.17852	0.849081	3.52569	0.616494	1.43299	0.126917	0.0999362	0.396904	0.410024	0.672211	0.0429675	0.673727	2.28075	15.0026	15.1537	47.8168
	32	6.31022	4.417	5.05818	3.99922	3.80042	2.79363	4.77076	5.26245	2.65364	10.951	3.19671	1.15198	3.47401	9.28749	11.9253	83.4646
	33	4.07578	0.792882	1.4182	0.433433	2.02346	0.19868	0.550391	0.618955	0.917975	1.11027	0.644916	0.918157	2.07387	10.5347	20.9587	45.5072
ActiGraph Wrist	Calibrated Euclidean Norm Minus One (measured in milligravity units [mg]) for each individual for each activity - ACTIGRAPH Wrist
	ID Number	Activity: Lying				Activity: Sitting							Activity: Upright
		1	2	3	4	5	6	7	8	9	10	11	12	13	14	15	16
	1	11.8346	3.8492	6.21513	2.19388	2.74461	0.478484	0.742915	N/A	N/A	6.8961	4.8923	5.32335	35.0087	47.603	97.9515	116.351
	2	16.487	2.93778	5.72824	2.05187	6.34195	2.11678	3.24357	N/A	N/A	7.38217	5.38796	5.7201	46.9271	50.8497	86.5504	123.719
	3	10.7602	1.78166	12.1664	4.0239	9.11112	10.24	7.61392	5.18542	6.63799	18.4635	5.74211	7.16447	57.1719	38.986	70.616	50.8488
	4	1.01675	0.158605	0.449429	1.6464	0.97352	0.421995	1.87436	3.2752	0.996401	2.16112	25.5994	4.49184	63.0783	35.2059	100.764	41.0907
	5	2.2955	8.56506	6.89591	2.90007	23.0531	16.0733	41.5148	16.6458	15.5948	15.6912	6.3727	7.8555	139.225	235.189	207.454	153.922
	6	18.8772	0.588356	11.7091	7.82193	5.0411	3.63376	1.87584	5.81549	3.03475	5.56443	6.48405	5.87492	33.3741	52.1787	96.7933	89.5788
	7	7.9518	1.0571	2.64104	1.49471	3.97236	1.65949	0.523213	0.691259	1.87008	5.6503	5.5258	6.99925	41.3029	128.479	91.0966	117.86
	8	8.03031	17.2327	4.08255	0.152476	23.0128	30.6682	33.7974	21.2559	31.1499	10.018	19.9962	20.7833	53.4838	66.1127	235.766	130.788
	9	8.77407	1.84089	3.39866	3.4501	6.56238	0.343428	0.31867	3.71905	4.42803	16.4589	7.8662	8.11546	39.4914	74.5825	123.464	135.903
	10	25.199	38.4372	47.573	34.4785	64.0562	39.7533	39.6748	64.9419	64.0114	46.3241	21.5409	54.1345	44.1077	17.482	5.37247	11.2981
	11	0.505577	0.751515	5.30697	3.46785	6.79886	2.88688	5.70664	2.70142	5.43371	9.04949	3.99078	5.0098	58.7844	82.6205	146.796	115.422
	12	16.7939	1.01817	9.63446	2.47138	6.89547	9.68924	15.8938	9.97644	2.15044	5.75804	1.57014	8.5314	30.7968	77.2468	119.297	81.2103
	13	7.11847	0.578296	8.00647	7.16437	7.05807	1.96504	2.3352	3.30127	2.21302	4.87057	2.39891	2.81831	25.9674	37.4122	103.185	93.5345
	14	7.98646	3.54288	5.97334	6.79328	12.6135	5.67378	6.0688	7.31784	7.39302	19.4492	8.5628	11.7543	42.6982	47.6587	91.2342	74.7617
	15	13.6853	5.05566	11.2092	10.0507	8.32149	3.49889	4.77875	11.3383	5.26579	7.9117	6.00834	8.62069	40.7923	72.3089	151.641	150.227
	16	3.72916	7.13936	5.26677	27.485	18.0979	28.7457	22.6062	14.3616	21.0367	18.0288	11.049	11.5756	18.7204	28.2603	38.4234	18.5897
	17	10.409	1.62376	6.15406	2.648	9.5604	12.4832	2.11312	3.89784	2.32518	8.19955	6.47577	6.44316	44.5441	50.3066	109.103	136.229
	18	5.60026	0.53469	4.01529	4.53718	6.83778	5.62271	1.79371	8.80901	1.04189	9.44516	3.26388	5.97896	85.5121	110.544	69.6701	83.961
	19	6.46333	1.28729	11.3686	5.62524	17.3719	3.56777	4.72849	6.42075	5.71183	4.54129	9.01803	11.2881	58.5346	37.7672	137.518	178.781
	20	7.63096	6.3105	3.11382	1.49712	8.48299	4.27304	10.7486	4.59692	7.71356	2.97881	13.6283	8.26161	63.6279	90.8063	60.7452	112.945
	21	14.7489	8.61923	10.7966	9.33306	24.711	6.25355	10.6682	15.2363	13.9734	28.4584	12.8551	14.5046	46.7184	45.9281	169.861	144.367
	22	6.56123	2.71467	15.09	4.58857	11.4119	3.91912	4.23993	4.44249	7.50408	33.4269	32.4514	12.0797	67.4631	47.0706	209.326	126.875
	23	2.643	0.469319	4.61111	1.20718	5.0944	1.8393	1.3994	1.13297	2.19597	17.9965	10.101	5.15088	59.6562	43.3253	127.885	91.1113
	24	8.91618	2.87529	3.05323	0.946757	8.20399	4.12527	3.39104	5.59634	5.69911	9.49248	9.44898	12.2525	47.9266	58.8481	127.042	70.9604
	25	5.86479	2.57773	7.78771	3.53339	18.9551	5.82711	7.96554	10.5193	8.83298	12.1531	8.64767	23.0008	39.2934	136.117	170.261	149.329
	26	7.46281	6.28279	1.93004	1.75572	11.351	6.36947	3.34374	2.89678	6.60415	13.9004	9.25136	7.00915	48.8812	66.8051	73.639	91.1312
	27	7.54738	0.734806	4.67492	2.83033	13.7315	3.35661	6.15941	4.34501	6.19005	14.568	11.9861	7.92617	87.5912	67.0125	61.9173	133.768
	28	11.7976	10.4719	12.7322	32.1576	27.4937	19.35	16.267	3.4799	5.98953	4.86049	1.92511	0.915895	5.18133	2.56824	0.828832	3.42184
	29	9.42959	3.01061	3.48362	4.22941	8.53618	3.5419	5.25744	2.81451	4.12641	11.652	8.92715	8.14143	168.546	61.7223	88.7607	108.143
	30	2.65607	3.1271	5.44884	1.5138	7.31426	4.89273	4.0894	3.14777	7.49119	15.4997	4.37942	4.73569	42.0164	69.2818	107.703	95.6235
	31	7.29414	6.77848	2.84606	0.451683	10.1931	5.82362	10.9318	7.46617	11.0192	16.4988	9.63937	13.7	35.9307	57.1462	83.4327	89.6728
	32	2.48614	3.65047	2.85341	0.846787	10.459	2.97084	6.60602	10.2809	3.99802	18.9116	6.36267	5.8244	50.6087	139.098	116.992	132.513
	33	25.2438	29.2437	11.4669	1.49911	28.9758	23.5282	26.3202	25.4537	21.0649	26.5056	23.8444	17.4064	51.3579	45.3433	65.0153	149.358

## Sheet: ENMO - GENEActiv
GENEActive Hip	Calibrated Euclidean Norm Minus One (measured in milligravity units [mg]) for each individual for each activity - GENEACTIVE Hip
	ID Number	Activity: Lying				Activity: Sitting							Activity: Upright
		1	2	3	4	5	6	7	8	9	10	11	12	13	14	15	16
	1	4.42807	2.92697	4.80185	6.45694	4.62962	4.08524	3.548	N/A	N/A	5.62422	3.35646	2.35346	2.47812	12.545	24.8918	85.8634
	2	12.1192	6.4572	4.21802	1.7709	9.56755	14.19	14.413	N/A	N/A	11.6388	10.3018	9.86272	7.6139	17.9844	23.8521	73.9437
	3	5.8025	3.08886	7.41821	6.66155	5.19355	3.87532	4.52516	4.36589	3.26253	6.63582	3.0692	4.10907	3.59088	8.62621	13.2406	28.7443
	4	2.85263	0.6987	12.5618	11.7298	5.48126	3.69183	5.63276	4.76378	4.34403	4.49245	2.3061	4.998	6.28911	14.9657	17.3816	27.7121
	5	3.2612	4.1979	11.4635	11.3161	7.68709	3.11109	5.51292	5.37658	6.0286	11.6983	2.48129	8.86565	15.2491	30.7985	38.5889	74.1932
	6	11.1604	3.99874	12.8784	17.5663	4.41683	6.45897	7.1131	8.20347	9.59445	13.075	14.0041	29.6117	28.6162	30.3504	26.0546	72.2
	7	4.36835	3.93596	3.38455	4.16425	4.11891	2.18624	1.95251	2.06712	3.15422	3.74704	2.44886	4.28455	4.73503	14.6735	13.2963	68.8508
	8	3.34922	3.27669	12.8508	11.6871	7.44814	7.55413	7.07115	6.92855	5.17768	5.34874	2.87882	3.97948	4.67748	17.407	23.9237	75.1185
	9	15.3946	12.2938	7.50764	6.96518	4.05342	2.5606	3.68371	3.27544	3.91123	2.38952	2.4619	3.68576	4.25594	17.4409	16.7028	68.037
	10	4.95071	2.60151	6.62169	8.49441	5.52653	2.33034	2.15359	2.21702	6.18167	4.32631	5.07814	11.0646	12.8785	13.6184	26.6642	71.5086
	11	1.72843	1.64174	2.60089	2.77321	5.87749	3.71836	3.17558	2.38921	3.23857	2.23293	2.13827	5.23712	7.40659	21.6347	51.8388	59.264
	12	6.95311	2.87851	10.1418	9.05018	4.30866	3.26939	3.64737	5.23987	5.15338	3.11586	2.18271	3.50305	3.6366	20.6772	13.4584	28.8365
	13	5.93512	6.15335	4.71163	2.46513	6.88718	5.41542	6.16646	7.56121	7.57185	7.25462	6.11562	4.83246	5.70998	8.64123	22.6329	64.3155
	14	7.68161	7.48252	3.73492	2.80477	15.8499	18.0709	8.94915	11.9842	24.1789	31.1047	31.2246	34.601	35.9944	41.2051	45.4734	73.8252
	15	5.11885	3.34187	10.1969	10.9041	4.32888	1.91984	0.996302	2.26404	2.65922	1.93921	1.19476	2.5625	5.79395	12.6387	34.6384	69.6545
	16	3.94483	4.11165	10.8707	4.47864	3.31587	1.63761	2.20017	3.55166	2.32557	3.29375	1.25779	2.82614	5.10297	22.4066	26.7634	47.298
	17	9.71733	13.2698	12.1053	13.0457	11.215	37.0449	29.4393	22.5524	30.6854	39.803	31.2736	33.1549	36.016	47.9401	49.1458	123.894
	18	3.57586	4.40927	7.78916	8.76824	5.99696	2.62861	2.1248	5.6598	3.87886	3.64835	2.78354	4.20216	6.06948	19.8203	21.3186	60.8665
	19	7.59056	7.07667	19.7988	15.3003	2.08415	2.88694	1.96177	1.21477	1.12615	0.834882	0.505535	1.45039	3.07197	7.73141	11.4021	70.3849
	20	7.08721	5.35939	7.94436	7.8373	5.84551	5.86231	7.28433	4.37752	4.84202	3.6914	3.54315	4.31136	4.80027	28.12	39.2673	89.7121
	21	5.68853	4.55067	7.59692	6.84309	6.32797	2.0188	3.459	6.2439	3.41421	6.42931	4.67492	4.88304	5.07482	9.22668	12.3138	45.5132
	22	6.3062	7.36638	3.22297	1.44616	7.34217	7.27531	6.83177	5.80571	6.33723	8.76894	14.2887	11.9374	14.3291	22.5333	29.4526	64.5068
	23	1.71625	1.79972	5.03264	5.08516	6.03598	2.70883	3.33344	3.33572	3.40029	4.07202	3.64856	3.93059	13.1743	10.8829	22.0093	61.3989
	24	3.29907	3.9744	6.1906	6.6122	3.20762	1.96486	3.52629	3.70871	1.67362	3.36477	2.81986	2.58713	8.00813	12.5096	11.1933	30.6242
	25	5.1358	4.63201	6.99261	3.6978	8.21578	4.96237	5.31499	5.18776	5.55815	6.72176	4.98222	8.93656	13.8233	37.5112	52.1469	99.1364
	26	5.38404	5.16389	5.87721	1.28526	19.6212	16.4534	11.9878	1.93046	6.3987	14.3496	7.52464	7.93893	11.9627	31.6652	25.9177	66.0229
	27	6.5647	4.40568	4.90682	4.83515	7.01781	5.09899	5.3591	4.71735	2.20519	1.8779	4.87666	3.3109	6.54846	14.9278	11.9798	69.401
	28	7.97073	9.88827	7.82903	9.72513	2.48603	1.20334	1.33346	0.853057	1.96969	2.66874	5.72578	2.62289	7.11916	14.9216	17.3578	39.0053
	29	5.26542	3.12333	4.27333	6.82643	7.41499	5.95664	6.00378	7.71938	4.14553	5.56627	4.1605	4.60229	8.71088	15.538	18.162	61.1314
	30	5.71906	11.3107	3.09405	0.355799	2.40976	1.13423	1.34164	1.40904	2.20799	4.09413	3.33486	7.2609	9.72506	29.5431	46.052	73.4684
	31	10.0265	7.71613	3.95051	3.06499	10.159	12.2606	11.0679	11.4299	9.7838	9.01537	8.34243	9.26128	9.31831	21.9036	22.7003	56.5561
	32	53.8696	50.0097	9.40629	1.79889	8.25867	12.0263	10.543	9.99335	4.74685	6.89357	6.60496	2.60344	4.80141	9.69187	12.823	82.7349
	33	6.96901	5.10997	3.58366	3.14744	8.89036	6.95542	7.89461	9.23024	4.72605	3.79605	5.21873	5.23756	7.1967	13.855	28.1865	54.1634
GENEActive Wrist	Calibrated Euclidean Norm Minus One (measured in milligravity units [mg]) for each individual for each activity - GENEACTIVE Wrist
	ID Number	Activity: Lying				Activity: Sitting							Activity: Upright
		1	2	3	4	5	6	7	8	9	10	11	12	13	14	15	16
	1	14.6344	3.59793	11.0671	3.8098	6.58714	4.58447	5.56679	N/A	N/A	11.8142	5.81576	7.24942	34.1014	46.9783	98.6965	113.101
	2	19.7597	5.27327	9.1297	5.86899	11.1628	9.01356	8.02616	N/A	N/A	13.494	7.04331	8.68908	45.7657	50.1629	82.7738	105.923
	3	11.6707	3.27454	14.0441	6.19723	10.1583	13.8906	9.52007	5.79576	9.37491	19.5623	6.21496	11.9038	54.1537	41.6203	70.0355	52.0431
	4	23.6472	18.0426	20.3218	23.8896	14.2069	5.04626	11.802	3.842	3.59852	19.5238	7.57896	8.89604	45.7573	49.3173	106.434	47.1953
	5	1.45531	5.84469	5.99328	4.77401	25.2439	14.7717	44.6497	21.4926	16.3867	17.0665	11.1462	25.3001	145.367	231.81	212.67	151.634
	6	15.4956	1.11211	3.43556	0.22808	4.42574	3.59345	1.9566	2.32953	2.00748	3.7863	6.57807	5.18011	34.6842	45.2233	98.0096	84.8984
	7	9.44408	2.51282	3.28278	2.08186	3.11297	1.90666	1.40775	2.53272	4.12084	7.63427	7.43568	9.79007	41.1097	114.872	86.1556	105.034
	8	16.621	11.2194	9.73555	6.40225	11.776	9.56904	5.12596	13.7685	9.84461	20.4315	7.74979	11.7498	43.4482	55.6796	224.923	122.843
	9	9.51793	1.68264	5.29277	5.63488	8.74596	3.07414	2.5916	3.74847	6.25306	17.6333	9.47714	5.80201	41.5308	71.2479	118.445	130.296
	10	9.20398	5.26904	9.82291	4.11741	10.4548	10.5152	9.43567	17.4731	17.8326	15.1214	4.45989	6.65287	63.7628	39.682	164.569	143.675
	11	5.05373	5.07248	8.19367	3.59047	14.1248	9.61756	11.4129	9.78331	11.8463	11.9318	8.56705	13.1142	62.8187	91.0064	146.982	120.249
	12	19.2709	3.64095	11.5037	4.43194	10.4472	13.7745	17.4345	13.5919	5.44951	9.36594	4.33391	12.4194	31.9338	77.3459	113.155	79.3278
	13	16.8785	12.0496	16.4652	15.7911	26.5224	23.8162	22.8934	21.2096	21.3912	21.1373	10.2945	19.96	34.8383	46.2258	114.424	102.171
	14	9.93989	5.94447	10.3249	13.1349	17.5654	4.71892	2.50884	2.56851	3.79432	20.4359	8.26619	8.17972	41.7709	36.8566	75.4877	64.9431
	15	16.2052	5.27725	13.233	12.6191	13.3209	6.20663	8.59498	14.4817	9.56634	12.9177	10.165	11.6476	42.4384	73.5957	145.914	140.622
	16	19.1053	10.2264	29.6255	22.1467	22.0894	15.1265	16.2763	19.8744	21.0937	32.1256	26.6619	10.4108	64.6452	70.9502	114.5	76.2038
	17	13.1067	7.04319	9.11817	4.33418	13.9853	18.0283	9.39717	10.9525	8.79035	12.9775	7.21069	12.5276	45.0673	51.6122	110.996	131.845
	18	12.6737	8.62347	22.8176	22.2203	15.0446	11.6575	7.49647	15.1885	6.48029	25.1686	10.797	11.3376	81.9952	101.37	72.9291	86.2219
	19	14.4104	10.5544	18.6048	8.91463	20.1191	6.2305	6.62252	11.3884	11.6033	9.33309	10.4535	11.5957	51.9728	36.2094	135.769	166.777
	20	6.84191	5.33359	4.06716	2.52083	8.80393	5.68631	12.0411	5.65167	8.69058	4.93848	8.46978	8.93397	65.6668	90.2101	65.0348	108.302
	21	15.4095	6.93916	22.8554	11.0603	26.6441	10.5548	7.64221	18.3524	10.3657	47.0709	9.20596	18.2451	40.5895	46.9415	141.426	125.063
	22	10.1856	5.76357	10.0042	3.66942	17.6899	8.1425	11.8486	11.4665	12.783	33.3805	35.8446	16.7281	72.8796	51.1762	221.886	126.969
	23	5.17358	2.58479	7.63585	4.17664	8.84591	6.26659	4.29832	5.3258	5.86664	19.0555	6.24961	10.7654	57.3222	45.1617	124.894	83.498
	24	16.1446	12.2233	9.82276	6.18738	9.15798	8.19016	8.48808	7.71462	6.99122	15.3864	11.5329	9.07671	52.9141	65.7957	131.934	65.7845
	25	14.4582	13.0073	22.1834	17.6111	18.7861	12.0304	12.1302	6.32438	5.3359	16.1877	5.8254	21.8515	44.9876	156.524	181.334	156.571
	26	8.11964	8.03582	6.59746	8.28717	13.858	11.4493	7.90289	5.696	7.20712	18.0749	6.45352	6.46997	57.3927	73.1636	86.9714	100.522
	27	19.4626	9.99623	11.0777	7.59102	16.8976	9.37227	9.70887	10.7905	7.76816	17.8139	12.6723	9.29564	108.201	71.1817	68.4019	149.131
	28	22.5364	10.6585	18.0374	15.5378	9.39481	11.9579	10.7908	5.55674	5.7056	11.8901	5.3919	2.79655	19.8507	35.4088	70.2751	87.377
	29	14.5455	5.80923	8.1852	9.81887	6.47485	4.63113	4.11145	3.36071	3.25358	11.1991	10.2575	6.60972	225.111	73.0066	99.2574	119.994
	30	7.8864	3.85896	5.94564	2.82108	6.13698	3.89531	5.84423	4.63746	7.59437	15.164	5.81576	3.3776	44.0939	77.4187	128.407	110.388
	31	19.7781	16.1054	19.0989	12.5902	6.43342	12.6517	22.2744	5.31275	4.59981	25.847	15.6502	11.2306	31.8099	58.1421	91.9754	90.9472
	32	8.29266	5.4666	10.5081	8.08066	9.02697	5.21403	3.23976	2.32598	4.71249	22.1718	5.43409	6.77362	64.0227	167.869	131.812	150.6
	33	13.7536	7.37786	20.1955	21.5798	14.6464	3.97025	5.55865	5.22742	8.90175	19.7999	9.26193	11.6605	39.505	43.0266	58.1511	159.943

## Sheet: MAD - ActiGraph
ActiGraph Hip	Mean Amplitude Deviation (measured in milligravity units [mg]) for each individual for each activity - ACTIGRAPH Hip
	ID Number	Activity: Lying				Activity: Sitting							Activity: Upright
		1	2	3	4	5	6	7	8	9	10	11	12	13	14	15	16
	1	0.297815	0.776066	0	0	0.637376	0.530229	0.935372	N/A	N/A	1.71702	1.49262	0.276904	5.75819	32.6493	47.792	173.833
	2	2.46745	0.12543	0.177448	0.0912772	0.612825	0.0823683	0.334542	N/A	N/A	1.19217	2.48559	0.560264	2.37345	24.4332	22.1743	142.048
	3	1.87157	0.257213	1.36753	0.443686	3.02193	0.234461	0.980841	0.340186	0.449143	0.137616	1.6159	2.05297	3.02093	16.6589	26.6083	59.7748
	4	1.15382	2.89994	0.726402	0.852102	1.58412	1.66383	1.85372	1.97917	0.936434	0.679916	0.756648	3.53701	7.43699	22.7248	22.6585	48.6139
	5	1.05478	0.654445	7.13091	4.27705	7.02012	1.75943	4.33887	3.76407	5.83409	1.51568	2.8382	5.20314	10.5784	39.6887	44.8763	125.554
	6	0.382158	0.0829227	0	0.187679	0.299519	0	0.126074	0.0563182	0.284087	0.1408	0.193994	0.692522	0.810173	34.7062	29.1505	129.073
	7	0	0.360097	0.621736	0.58809	0.534612	0.383057	0.107712	0.440208	0.519979	3.45217	1.00876	0.88906	4.73732	28.9612	21.6945	136.517
	8	0	0	0	0	0.192563	0	0.800637	1.53096	0.410476	3.78042	2.09106	3.59805	6.70975	38.3652	44.9204	175.298
	9	0	0.35135	0	0.184374	0.244099	0.192199	1.07162	2.1049	2.19782	0.672572	0	1.24122	3.2757	31.5618	28.8279	116.69
	10	0.223092	1.23134	1.59496	0.180229	1.46346	2.78448	3.71992	1.48314	3.15919	0.565716	0.360103	2.44197	3.37027	7.36956	31.5613	126.846
	11	0.146919	1.8185	0.597076	0.489915	1.43014	1.07935	1.07153	0.697247	1.10168	0.492515	1.1975	2.86311	6.44168	39.2618	82.376	111.999
	12	3.52847	5.59396	1.17444	0.429441	3.02991	0.642081	1.80677	2.75209	0.849666	0	0.490204	4.65106	4.453	16.421	24.2171	59.3447
	13	1.09755	0.177149	1.84441	2.0952	1.57386	1.55673	1.22628	2.27543	1.56405	0.751322	0.466007	2.05174	3.07333	14.8073	41.4357	120.366
	14	1.86817	4.63637	0.427545	1.15574	2.53137	1.34308	1.53711	2.76028	1.94637	0.751814	0.605501	2.37763	6.94842	27.3512	29.5724	101.479
	15	2.84124	2.87417	2.05451	2.50411	3.29642	5.92995	1.1792	6.25584	7.00008	4.37588	4.72876	1.46026	8.18585	24.0368	55.2525	118.453
	16	1.24793	2.19176	0.209479	0.23895	0.425593	1.27472	1.45141	3.59768	2.51309	0.839571	1.19094	0.986357	10.8742	44.9798	42.4709	96.9026
	17	2.65912	0.40169	0.148634	0.141729	0.362229	0.425135	1.34809	0.820719	0.58325	0	0.522982	3.52929	5.16265	44.3679	35.7789	188.284
	18	1.85364	2.13107	0.190235	0.785687	5.50202	2.00786	2.90113	2.32894	3.74675	1.52945	2.21106	3.15293	7.68583	37.6543	30.5139	118.211
	19	2.28709	0.374344	0	0.138315	0.118427	0.496889	1.10326	0.657612	0.417283	0.54642	0.417454	1.26876	2.80659	19.1924	17.7639	144.18
	20	1.65721	1.8704	0.953696	0.403354	1.41665	1.64979	3.42319	1.7236	0.774535	0.225783	0.999511	1.41002	4.32001	54.9415	64.5604	167.263
	21	0.100579	2.42255	0.391538	0.461738	1.57097	0.404889	2.15945	4.05728	3.59913	0.669874	1.9815	1.23101	6.20219	14.9143	24.8847	97.6238
	22	1.42365	1.09773	0.0650424	0.534772	1.51494	1.07332	2.32387	1.87772	0.653983	1.74627	1.66558	0.776129	5.25893	23.7606	34.3165	114.863
	23	0.160361	1.0784	0.604446	0.562566	0	1.00696	0.578529	1.06951	1.19496	0.709956	0.78376	0.540769	17.357	15.5388	38.608	116.715
	24	3.40968	4.8006	0.512311	0.424414	1.79586	0.883812	0.336186	2.23674	1.02694	0.343542	0.201104	2.25274	13.254	23.1716	22.4299	61.8789
	25	3.29754	0.916803	3.80253	1.88147	1.44537	0.710176	2.91536	1.65528	2.27088	1.14832	2.1496	5.40331	20.1917	65.7643	94.9326	169.75
	26	4.52765	1.19054	0.254163	0	0.442823	0.247929	0.398851	0.835626	0.397184	0.973056	0	0.802337	8.63101	49.6828	36.2403	108.861
	27	0.850355	0.237828	0.245714	0	0.792948	0	1.02915	0.18304	0.17238	0.143244	0.529789	0.646062	10.5741	27.4178	20.9879	129.731
	28	0.377724	1.98135	0.159618	0	0.398136	0.0934917	0.627627	0	0	0	0.280894	0.0683592	4.96496	17.717	25.2834	67.6388
	29	1.49685	2.03652	0.297361	1.64177	0.709843	0.164333	0.644127	0.917382	0	2.05166	2.04418	0.58986	14.9476	25.3132	29.3132	122.265
	30	0.223234	1.55162	0	0	0	0	0.634926	0.0919578	1.94486	0	0.911851	0	4.98511	40.4267	60.5372	123.715
	31	2.56486	2.23267	0.538333	0.770705	0	0.109493	0.176178	0.132246	0.122294	0.382504	0	0.403482	5.50058	29.8763	35.9911	96.2368
	32	0.352826	0.12906	0	0	0.347295	0	0	1.0274	0	0	0.526486	0.366053	5.65816	14.7001	26.1061	174.997
	33	0.211155	0.0927703	1.90545	0.42841	0	0	0.629812	0	1.89312	0	2.56928	0.846223	3.77148	18.9874	41.8873	90.6848
ActiGraph Wrist	Mean Amplitude Deviation (measured in milligravity units [mg]) for each individual for each activity - ACTIGRAPH Wrist
	ID Number	Activity: Lying				Activity: Sitting							Activity: Upright
		1	2	3	4	5	6	7	8	9	10	11	12	13	14	15	16
	1	0	0	2.27842	1.17455	1.39705	1.038	2.76046	N/A	N/A	9.67465	4.25627	4.20947	71.3083	69.6856	142.52	149.336
	2	0	0	0.0911335	0.136005	2.24664	0.802707	3.36153	N/A	N/A	15.5617	10.5632	0.583273	103.171	74.0356	116.746	162.219
	3	2.13734	0	14.2626	4.85089	15.3144	13.59	14.7339	4.8072	8.29032	31.0074	3.94629	11.2212	109.334	49.0873	118.658	77.3351
	4	7.38539	4.98276	5.30767	8.84593	8.3024	6.58829	12.5701	11.7853	6.5037	17.5374	9.24897	11.6073	107.958	62.7827	172.324	74.9133
	5	0.191825	0	6.28476	3.6858	29.3367	14.7428	57.359	28.3466	27.5685	24.706	11.3283	16.7037	241.593	192.673	294.533	182.213
	6	0.370878	0	1.59964	1.10846	0.434019	0.887893	0.148562	0.622369	2.20781	9.1153	0.127854	2.18326	66.0297	78.6557	127.591	153.75
	7	0	0.172432	1.66694	0.912971	0.692115	0.268551	0.123791	0.608041	0.387702	8.45195	8.40193	1.63215	84.978	130.828	154.036	149.764
	8	0.681932	0	1.8681	3.32244	10.6672	14.2916	9.84761	14.0683	11.4219	15.641	13.9938	12.7009	78.4711	96.3734	263.866	168.822
	9	0	0.112021	0.247896	0.610826	0.612545	0.942285	1.96371	6.13687	7.44881	35.7579	7.03667	6.12805	79.2946	85.961	222	170.416
	10	0.116922	1.80847	4.43361	1.48431	7.36444	16.1728	11.0984	32.3255	27.893	17.5261	9.72831	17.1917	113.972	64.3272	256.719	221.623
	11	0.0947827	0.557408	2.57075	3.41657	4.71274	5.15052	9.51007	3.99799	4.62818	15.7767	6.96384	10.3201	107.116	123.265	255.35	155.108
	12	1.20807	3.66335	10.0519	6.36998	8.92156	22.0357	20.5755	17.4822	5.17177	10.7659	2.00157	19.4223	63.8471	87.1938	176.516	100.798
	13	0.101946	0.0884715	4.50841	5.04894	3.57815	2.79539	3.00385	4.79559	3.55996	7.92861	1.94252	5.2141	51.0025	67.1762	168.33	149.879
	14	3.81013	1.33254	1.15002	7.57911	5.31339	4.58748	7.37326	6.9085	9.04298	37.6936	0.853609	8.30604	83.8687	53.3571	177.769	94.7708
	15	8.38137	3.40312	15.9532	17.7739	7.69297	8.32187	6.48001	23.4315	8.23123	14.4396	11.2566	5.70174	64.2359	57.4802	204.782	157.33
	16	0.206348	0.132874	3.53079	3.45757	5.94231	5.78407	3.78306	11.959	7.2295	23.0914	9.88083	7.96192	110.109	119.002	174.847	125.927
	17	0.733358	0.207111	1.48866	0.29217	5.7711	3.41321	6.09174	8.41807	4.09329	17.1854	2.76589	8.50833	87.2307	83.7736	180.207	181.675
	18	4.39795	0	6.06159	7.34527	8.08004	13.0471	11.5191	11.2122	6.97323	37.043	7.09989	12.6198	151.608	155.807	104.136	136.135
	19	2.04104	0.257893	4.57097	5.28537	5.41664	3.71507	6.57268	9.45857	6.47309	4.83157	6.70982	9.13425	115.555	51.4402	244.816	177.555
	20	1.48414	3.01697	1.20133	1.27295	3.47895	6.1829	15.799	11.2084	11.6617	5.62948	7.93243	7.66431	118.612	147.979	89.0283	196.804
	21	1.25697	0.176482	1.58164	0.370882	3.78483	2.59651	13.4207	14.0091	12.6725	37.1916	4.9785	4.73433	83.8481	50.7921	276.542	198.649
	22	1.25434	0.790061	2.40848	2.64892	3.39631	4.19873	4.36275	4.01032	2.27655	54.274	50.8291	2.86501	121.46	63.9927	260.491	170.021
	23	0.691012	0.443618	0.820213	2.17163	2.08836	2.92604	2.26597	3.15695	4.9685	37.9572	10.7834	5.04388	102.023	50.8162	198.608	135.853
	24	15.1518	3.75603	3.70571	2.49714	5.536	3.67516	2.79324	3.36318	2.48215	17.2889	14.4492	6.52841	89.05	60.5747	92.9972	94.7297
	25	0.512453	0.650477	2.81037	2.88417	1.59485	1.27043	6.21956	4.12484	4.14873	17.3475	10.47	28.8492	66.2387	159.153	213.916	166.166
	26	7.48165	7.15809	2.42615	1.79135	3.58461	3.37479	3.64865	2.24096	3.02959	22.1122	8.27907	1.5904	80.7474	69.1902	107.758	144.527
	27	6.19962	0.250899	1.29907	1.12163	1.48446	3.42496	7.47581	2.16796	2.28351	25.1151	24.4208	4.32084	161.431	72.7398	106.916	207.849
	28	10.9457	0.346572	0.711844	3.66685	1.92309	1.05864	1.2313	2.04284	2.37247	6.53274	4.17335	0.0888755	34.3872	39.7923	112.518	126.391
	29	1.23296	1.64819	1.44579	2.07963	4.11347	0.351304	1.8773	0.330366	0.526073	18.8369	8.87782	1.24379	264.175	58.3441	127.151	143.63
	30	0.575107	0.143206	3.14952	0.571919	0.34627	0.378053	4.91011	0.679175	7.44273	25.3889	3.14993	0.322167	66.234	96.0433	172.591	133.195
	31	1.26117	0.805352	1.22759	0.906022	1.07685	1.91678	9.77337	2.72324	3.55462	25.6925	9.84277	4.24832	67.0988	63.4006	144.723	147.818
	32	1.22668	0.520696	1.03429	1.81995	0.931578	0.093794	0	0.914025	0	28.2981	7.58223	3.6747	78.6214	105.906	196.553	154.855
	33	0	0	2.2738	1.00944	1.84423	2.0322	2.93398	0.875393	3.96205	19.4585	13.9082	4.45344	83.4304	36.073	97.9773	190.596

## Sheet: MAD - GENEActiv
GENEActive Hip	Mean Amplitude Deviation (measured in milligravity units [mg]) for each individual for each activity - GENEACTIVE Hip
	ID Number	Activity: Lying				Activity: Sitting							Activity: Upright
		1	2	3	4	5	6	7	8	9	10	11	12	13	14	15	16
	1	7.88386	8.07735	5.80914	7.68661	7.06064	6.75228	7.31344	N/A	N/A	6.19343	7.53146	6.20347	7.80535	33.646	47.6475	186.212
	2	9.29656	9.09673	5.3752	5.47052	8.9649	9.67118	8.28473	N/A	N/A	9.15545	10.0018	5.97103	9.11651	27.1841	22.7373	152.292
	3	8.62522	8.10043	7.58017	5.9356	8.51485	8.51646	8.79	8.99481	7.13171	7.45409	7.21008	6.00723	6.1056	18.2512	26.6696	57.9938
	4	8.50416	7.99913	7.09042	6.69246	25.2577	8.00869	7.21714	6.60694	7.31314	200.361	7.24348	30.5339	130.988	79.9736	143.767	117.902
	5	9.54624	9.46109	10.8333	8.64128	9.93383	8.17552	9.98433	8.9133	9.30889	6.81797	9.0971	8.56245	11.347	43.1266	51.7415	138.389
	6	10.2499	8.56677	5.97329	6.60294	8.4288	10.252	9.95189	9.00538	9.2814	9.07328	8.65702	6.18737	5.96199	35.5862	30.4842	142.957
	7	7.35113	7.21578	6.55339	6.75365	7.80584	8.03363	7.55899	7.63891	7.21721	7.35062	7.10847	6.20828	7.66183	38.0543	24.1744	158.544
	8	7.1247	7.33248	8.37393	7.90069	6.74018	7.14344	7.19117	7.49716	7.27662	6.54902	5.08957	7.16298	8.74407	36.4462	41.8263	154.326
	9	7.74409	8.21576	7.29542	7.68487	6.66654	6.90952	5.95397	7.18858	7.87956	6.49224	6.54818	6.93425	10.6163	35.2565	31.7337	126.873
	10	6.54078	7.52036	10.0341	8.39784	6.92982	7.0117	8.47697	6.91237	7.84214	6.40188	6.16673	6.16362	6.61594	9.23654	33.6295	135.633
	11	7.14297	9.06666	6.14804	6.96019	7.62476	6.80282	5.97164	5.23941	6.23926	196.49	11.9171	7.22224	10.629	41.3096	94.1609	121.32
	12	10.0307	10.4984	8.02672	5.87393	9.12117	9.46003	8.67711	8.87078	7.87622	6.96352	7.08314	7.70965	6.96152	17.4035	25.3512	60.619
	13	7.73568	8.37038	6.85213	6.43897	7.41081	7.11108	15.8511	7.64638	7.42701	6.97826	7.39573	6.27986	7.6713	19.2927	48.621	150.269
	14	12.0316	13.9117	6.06551	6.83297	6.3541	6.10004	8.46049	7.09814	7.25895	7.78201	7.14643	9.15648	10.0929	29.5434	32.7486	100.359
	15	9.75412	10.1505	10.0368	11.1747	10.5183	11.9608	9.22547	12.6213	13.1098	10.151	10.7831	7.98129	12.0648	26.3884	57.4901	118.505
	16	8.61636	10.2199	5.9586	6.18016	7.23336	6.96515	8.33126	8.8977	7.44507	6.96971	7.0043	7.70259	12.783	48.0481	45.7265	101.777
	17	10.6365	10.0642	6.02968	6.22402	7.56752	6.60967	7.13204	6.84196	5.50995	7.08563	5.4218	7.36451	12.2649	45.9183	38.0204	198.018
	18	9.80686	9.03896	9.01701	9.40032	8.71874	8.14805	8.31818	8.16445	7.20287	6.70528	6.09484	7.45507	9.82638	38.4481	30.6453	123.008
	19	10.3826	8.62169	8.70745	9.1934	8.27337	8.62135	7.9689	8.26936	7.95895	7.69164	8.14165	5.81868	5.78725	19.2412	18.3533	154.81
	20	9.35021	8.92173	6.22763	6.19336	5.85823	6.6163	7.7098	6.11782	6.04841	5.13789	5.56488	5.05725	6.17861	55.7984	68.0247	170.634
	21	7.0722	7.71917	7.92102	7.88119	6.01712	5.60183	7.18248	9.14644	77.0412	6.87204	7.34829	5.48086	8.47882	17.1796	26.8991	100.335
	22	9.38731	9.48136	9.29479	8.92103	6.90274	7.66518	9.07385	6.11154	5.59682	6.03869	7.76283	6.22945	8.71681	26.8229	40.7583	121.37
	23	7.77753	7.80356	6.03656	5.83214	8.7603	8.26854	8.21981	9.81238	9.16918	8.42693	9.04574	5.28739	21.6974	17.7717	41.0841	119.781
	24	9.29262	9.91999	7.18558	6.36475	5.14523	5.52612	7.07599	7.31438	4.84624	6.00135	6.84169	6.35864	15.0869	25.0698	23.6049	62.1814
	25	10.5035	8.47995	7.36537	6.13238	7.2659	8.25495	9.37603	7.56251	7.6932	7.24847	7.46553	9.65017	21.8598	62.6882	95.1434	173.905
	26	10.3185	9.43482	8.11253	5.57754	8.52511	8.28757	8.21286	7.78386	6.22148	8.27618	6.4464	6.73611	12.7448	52.0486	40.5329	115.618
	27	8.4396	8.45144	5.80572	5.23811	7.70095	6.85208	6.93245	5.94754	4.76783	4.8148	7.2652	5.81293	11.1204	27.8959	22.641	139.341
	28	10.0122	10.0675	5.31005	7.00816	6.24066	7.16188	7.91347	6.03244	5.63166	6.06639	6.60026	4.98813	8.15179	19.2349	31.4944	70.2695
	29	8.86771	8.73845	5.83315	6.48024	6.76028	6.47801	7.02995	7.71492	7.25437	6.80107	6.70363	5.43568	19.235	25.5324	29.2523	123.902
	30	10.7988	9.07563	5.28644	4.42523	8.2262	8.09363	8.40121	8.73301	8.79402	7.99943	8.11167	6.48694	8.46836	42.7738	76.0436	135.692
	31	9.35502	9.09498	5.3874	6.1574	4.95648	6.02217	6.42919	5.70044	5.43484	5.77348	4.62176	5.9523	9.1458	30.5095	39.5613	100.342
	32	9.09079	8.71468	7.36992	7.57562	9.35417	8.14855	9.1189	10.0073	9.15528	9.36136	9.47127	6.84346	9.37687	16.6237	28.5818	165.345
	33	8.56347	8.88757	7.13435	7.06112	6.04048	6.44257	6.50808	7.63563	5.53213	4.48425	6.99668	5.2421	6.89086	21.6149	48.0894	101.482
GENEActive Wrist	Mean Amplitude Deviation (measured in milligravity units [mg]) for each individual for each activity - GENEACTIVE Wrist
	ID Number	Activity: Lying				Activity: Sitting							Activity: Upright
		1	2	3	4	5	6	7	8	9	10	11	12	13	14	15	16
	1	6.71189	7.84794	9.1929	6.7789	8.56951	7.7995	7.95842	N/A	N/A	16.5954	9.11504	5.85088	61.9353	65.6662	136.814	145.579
	2	8.24112	8.39473	7.61399	7.64667	8.50138	6.83697	10.2139	N/A	N/A	18.5365	12.7126	6.65007	106.862	72.2685	117.222	149.15
	3	8.64102	7.26564	17.7267	11.5086	17.3346	18.9308	19.5371	9.81461	12.6879	32.8636	8.794	13.2343	106.714	48.4529	107.322	74.2682
	4	12.0661	10.5902	11.5006	12.4241	14.3027	12.8097	17.1795	13.59	10.0029	26.8029	13.1411	14.0467	89.1885	62.2401	147.721	74.5219
	5	6.11583	6.08989	12.1393	9.78324	31.9884	17.9791	60.5173	34.349	27.8729	31.5048	13.7258	19.3863	225.679	175.344	287.181	171.597
	6	9.25188	8.01712	8.78528	9.12953	8.81398	9.00359	8.53791	8.50796	9.18537	16.0462	7.44433	8.04209	66.0331	72.7333	122.65	152.065
	7	6.78643	8.15622	10.0848	8.40147	8.02491	6.3703	7.02412	8.14461	7.45254	16.2193	11.2189	8.29825	81.3418	130.427	139.256	139.613
	8	7.61498	6.26874	9.61416	9.59818	11.6263	16.8235	13.5303	16.38	12.1803	23.5151	16.1481	14.3908	75.8603	91.1192	262.298	172.657
	9	8.36437	8.85865	7.50504	5.6329	9.05281	8.80729	9.74586	10.8488	12.8862	34.2216	8.8168	9.36094	78.6831	85.4672	213.257	171.148
	10	8.60411	9.98497	10.6382	9.20655	13.1841	21.0348	14.6588	32.9581	29.652	26.1667	12.8207	18.4655	106.649	61.6269	243.661	218.902
	11	7.46535	7.65132	10.098	10.1749	9.8139	11.7762	14.56	8.71755	11.0164	21.1859	10.0593	12.5585	109.432	126.523	247.944	153.008
	12	9.29409	10.9764	15.3217	12.1953	14.1258	26.9628	22.5705	21.1931	10.1324	18.6921	8.88572	21.395	60.4674	86.825	158.562	94.2292
	13	8.95094	9.13543	10.0328	10.5478	10.1877	11.2929	11.8999	9.80348	9.1244	18.6954	8.93692	9.49482	51.8368	69.9357	165.036	155.554
	14	11.5782	7.67031	9.34104	13.3645	9.11539	10.0762	11.3721	10.9736	14.0202	46.4959	8.77292	11.4001	85.9177	52.2409	157.585	97.1188
	15	14.7416	10.4922	21.8973	22.7965	12.6698	12.0725	11.9504	26.5867	12.8499	23.3305	19.0256	9.94796	64.639	65.0256	196.038	151.131
	16	6.96235	5.70114	9.91823	9.98569	10.6611	10.7902	9.08821	14.6405	12.093	26.7381	14.2602	10.5714	111.813	115.411	175.028	120.171
	17	7.14588	7.16053	8.24714	7.62745	9.92769	8.09775	11.9003	13.0936	8.02415	23.9921	9.55218	10.5847	83.0345	82.3883	173.428	176.129
	18	10.2532	6.85794	13.3267	13.0199	13.1608	15.4917	16.6608	15.1668	11.9344	45.1173	11.4133	14.6785	134.975	137.461	95.4573	129.389
	19	9.13954	8.04551	8.41404	10.9735	10.3344	10.2151	13.199	19.285	12.6159	11.2651	10.5595	11.6237	96.1707	45.9334	241.163	173.036
	20	9.76332	10.912	8.38176	8.93399	9.2098	12.1861	20.5619	14.8914	15.5906	13.4348	13.691	11.5001	122.054	143.49	92.2282	191.097
	21	7.90438	6.92361	10.4729	7.85448	9.02805	9.5058	13.7312	17.9149	12.3464	40.9942	9.97556	8.21227	73.0889	54.1808	232.066	173.589
	22	8.21756	7.88496	7.56018	8.28542	9.82706	10.0629	9.59558	9.67626	8.51587	55.0649	58.3243	7.15733	129.079	69.0548	282.24	173.094
	23	8.2022	7.92011	8.59688	8.2733	8.29923	9.81837	8.09216	10.3827	9.63717	38.2776	14.7385	8.8727	91.8704	52.9757	179.978	132.133
	24	23.0762	12.2303	10.2806	9.54277	10.2061	9.36578	8.97171	8.69073	7.86757	25.3307	19.7239	13.7404	92.8147	77.6797	94.8015	95.7091
	25	9.47884	10.0111	11.6327	9.82978	7.09602	9.74942	12.6077	8.48575	8.92488	23.0384	13.5126	33.4074	84.2617	189.711	245.703	175.733
	26	13.0019	13.862	10.398	9.17183	9.75605	11.3186	11.4818	9.19865	8.79143	30.6143	13.5755	6.86024	93.9613	76.5179	119.563	154.112
	27	13.0368	9.73168	8.18551	8.17321	7.39178	8.39727	11.6511	7.81944	6.84654	30.5754	29.1663	7.60886	182.94	76.8196	114.648	216.745
	28	18.9822	8.45599	9.3558	10.7189	8.08614	9.06684	9.14209	8.64553	8.29859	12.8259	10.3833	6.29238	40.9633	47.3516	129.62	138.213
	29	12.0775	9.4717	10.039	10.1737	10.3319	8.58459	8.51175	8.54358	7.88644	24.6897	13.865	6.76353	346.519	68.9821	145.673	156.573
	30	9.1312	8.95697	9.25363	9.50188	8.4446	7.82137	10.5344	7.42471	11.4937	29.2149	9.9433	6.33319	75.5935	107.457	213.923	143.716
	31	8.37125	9.05747	9.64351	9.55725	6.34615	9.70148	14.4491	7.89826	10.5428	32.1341	13.8525	9.51759	75.6419	64.0774	161.443	155.883
	32	9.20051	8.47709	9.01747	9.90261	8.43762	8.45339	8.36183	7.70002	6.95413	37.1642	12.3382	7.25779	97.7737	124.753	207.258	161.185
	33	5.17486	5.31754	9.825	8.28578	6.13316	6.92666	7.40621	5.75141	7.85411	25.2964	16.1725	8.64271	82.1858	45.3471	103.275	214.518
